# Supplementary material for: Physiological Profile Assessment of Posture in Children and Adolescents with Autism Spectrum Disorder and Typically Developing Peers
Source: PubMed Central journal article supplement (PMC7601261; doi:10.3390/brainsci10100681), 2020-09-27
Supplement: brainsci-10-00681-s001.pdf [file brainsci-10-00681-s001.pdf]

Supplementary Table S1. Physiological Profile Assessment percentiles in typically developing children and adolescents. The five physiological subsets are presented. For all items scoring over the 90<sup>th</sup> percentile indicates poorer performance, Items scoring under the 10<sup>th</sup> percentile indicates better performance.

| <i>Vision</i>                      | Percentile | Age (years) |       |       |       |       |       |       |       |
|------------------------------------|------------|-------------|-------|-------|-------|-------|-------|-------|-------|
|                                    |            | 6           | 8     | 11    | 12    | 13    | 14    | 16    | 18    |
| <b>Visual acuity-high contrast</b> | 10         | 0.93        | 0.92  | 0.70  | 0.87  | 0.80  | 0.83  | 0.68  | 0.81  |
|                                    | 50         | 1.05        | 1.06  | 0.99  | 0.95  | 1.00  | 0.93  | 0.93  | 0.93  |
|                                    | 90         | 1.17        | 1.17  | 1.09  | 1.16  | 1.30  | 1.11  | 1.04  | 1.05  |
| <b>Visual acuity-low contrast</b>  | 10         | 1.22        | 1.12  | 1.18  | 1.14  | 1.08  | 1.08  | 1.03  | 1.07  |
|                                    | 50         | 1.32        | 1.28  | 1.30  | 1.34  | 1.35  | 1.17  | 1.21  | 1.15  |
|                                    | 90         | 1.46        | 1.38  | 1.39  | 1.71  | 3.67  | 1.41  | 1.32  | 1.34  |
| <b>Edge contrast sensitivity*</b>  | 10         | 23.80       | 24.00 | 24.00 | 24.00 | 24.00 | 24.00 | 24.00 | 24.00 |
|                                    | 50         | 22.00       | 22.50 | 22.00 | 22.00 | 21.50 | 23.00 | 21.00 | 23.00 |
|                                    | 90         | 19.40       | 19.00 | 19.20 | 19.60 | 20.00 | 21.00 | 18.70 | 21.00 |
| <b>Depth perception</b>            | 10         | 0.76        | 0.26  | 0.49  | 0.55  | 0.53  | 0.25  | 0.38  | 0.33  |
|                                    | 50         | 1.20        | 1.08  | 0.80  | 0.83  | 0.85  | 0.60  | 0.69  | 0.83  |
|                                    | 90         | 5.00        | 2.70  | 1.79  | 1.34  | 3.85  | 1.63  | 1.87  | 1.38  |

Note: \* indicates percentile scale was inverted, i.e., for all items a score over 90th percentile is an indicator of a worse performance.

| <i>Peripheral sensation</i> | Percentile | Age (years) |      |      |      |      |      |      |      |
|-----------------------------|------------|-------------|------|------|------|------|------|------|------|
|                             |            | 6           | 8    | 11   | 12   | 13   | 14   | 16   | 18   |
| <b>Proprioception</b>       | 10         | 0.84        | 1.14 | 0.64 | 0.00 | 0.60 | 0.30 | 0.76 | 1.00 |
|                             | 50         | 1.80        | 2.00 | 1.60 | 1.20 | 1.60 | 1.70 | 1.60 | 2.00 |
|                             | 90         | 4.16        | 3.90 | 3.16 | 3.18 | 8.10 | 3.40 | 3.68 | 3.20 |
| <b>Tactile sensitivity</b>  | 10         | 3.22        | 3.22 | 3.22 | 3.07 | 3.22 | 3.22 | 3.22 | 3.22 |
|                             | 50         | 3.22        | 3.22 | 3.84 | 3.84 | 3.96 | 3.53 | 3.84 | 3.84 |
|                             | 90         | 3.84        | 3.84 | 4.08 | 4.08 | 4.43 | 4.08 | 4.56 | 4.08 |

| <i>Lower limb muscle strength</i> | Percentile | Age (years) |       |       |       |       |       |       |       |
|-----------------------------------|------------|-------------|-------|-------|-------|-------|-------|-------|-------|
|                                   |            | 6           | 8     | 11    | 12    | 13    | 14    | 16    | 18    |
| <b>Ankle dorsiflexion force*</b>  | 10         | 8.00        | 9.90  | 11.80 | 14.80 | 22.50 | 18.00 | 18.20 | 22.00 |
|                                   | 50         | 6.00        | 7.00  | 8.00  | 6.50  | 12.00 | 12.00 | 14.00 | 15.00 |
|                                   | 90         | 3.00        | 3.70  | 4.00  | 4.00  | 7.00  | 7.50  | 7.80  | 11.00 |
| <b>Knee extension force*</b>      | 10         | 22.00       | 25.20 | 35.20 | 43.00 | 56.50 | 47.00 | 87.40 | 78.00 |
|                                   | 50         | 12.00       | 16.00 | 26.00 | 27.00 | 41.00 | 34.00 | 41.00 | 54.00 |
|                                   | 90         | 5.20        | 8.10  | 17.60 | 17.20 | 20.50 | 23.00 | 20.00 | 42.00 |
| <b>Knee flexion force*</b>        | 10         | 10.00       | 15.80 | 20.20 | 21.40 | 29.00 | 33.00 | 43.00 | 52.00 |
|                                   | 50         | 7.00        | 10.00 | 15.00 | 16.50 | 24.00 | 27.00 | 28.00 | 36.00 |
|                                   | 90         | 5.20        | 7.40  | 12.20 | 10.30 | 16.50 | 20.00 | 23.60 | 22.00 |

Note: \* indicates percentile scale was inverted, i.e., for all items a score over 90th percentile is an indicator of a worse performance.

| <i>Reaction time</i>      | Percentile | Age (years) |        |        |        |        |        |        |        |
|---------------------------|------------|-------------|--------|--------|--------|--------|--------|--------|--------|
|                           |            | 6           | 8      | 11     | 12     | 13     | 14     | 16     | 18     |
| <b>Reaction time-hand</b> | 10         | 299.00      | 231.00 | 205.60 | 196.10 | 195.50 | 199.50 | 189.90 | 183.00 |
|                           | 50         | 377.00      | 312.50 | 279.00 | 233.00 | 225.50 | 232.50 | 214.00 | 204.00 |
|                           | 90         | 472.40      | 348.60 | 328.00 | 328.20 | 282.50 | 265.50 | 236.90 | 236.00 |
| <b>Reaction time-foot</b> | 10         | 448.20      | 371.20 | 289.60 | 271.30 | 242.50 | 263.50 | 243.30 | 218.00 |
|                           | 50         | 527.00      | 450.00 | 336.00 | 314.00 | 288.00 | 307.50 | 279.00 | 270.00 |
|                           | 90         | 582.80      | 560.30 | 471.80 | 377.10 | 342.50 | 346.00 | 318.00 | 301.00 |

| <i>Balance</i>                     | Percentile | Age (years) |          |         |          |         |         |         |         |
|------------------------------------|------------|-------------|----------|---------|----------|---------|---------|---------|---------|
|                                    |            | 6           | 8        | 11      | 12       | 13      | 14      | 16      | 18      |
| <b>Sway on floor-eyes open</b>     | 10         | 205.20      | 43.50    | 80.00   | 52.20    | 48.50   | 188.00  | 58.50   | 126.00  |
|                                    | 50         | 841.00      | 354.00   | 336.00  | 315.00   | 320.50  | 607.00  | 310.00  | 342.00  |
|                                    | 90         | 3002.20     | 2926.30  | 1190.40 | 2285.40  | 532.00  | 1695.00 | 1419.20 | 816.00  |
| <b>Sway on floor-eyes closed</b>   | 10         | 511.60      | 165.20   | 75.00   | 75.40    | 78.00   | 97.50   | 52.20   | 144.00  |
|                                    | 50         | 1360.00     | 559.00   | 480.00  | 253.00   | 171.50  | 666.00  | 322.00  | 544.00  |
|                                    | 90         | 4398.00     | 5613.60  | 1564.00 | 2732.10  | 1085.00 | 2329.00 | 2073.40 | 1755.00 |
| <b>Sway on foam-eyes open</b>      | 10         | 480.60      | 540.80   | 175.40  | 151.20   | 69.50   | 484.00  | 127.10  | 252.00  |
|                                    | 50         | 2250.00     | 1822.00  | 1155.00 | 757.00   | 1075.50 | 1200.00 | 738.50  | 812.00  |
|                                    | 90         | 8857.40     | 11657.30 | 3101.20 | 4116.40  | 2717.00 | 3170.00 | 2644.20 | 1505.00 |
| <b>Sway on foam-eyes closed</b>    | 10         | 888.00      | 1232.90  | 269.80  | 207.80   | 173.00  | 1189.50 | 315.70  | 580.00  |
|                                    | 50         | 4620.00     | 2940.00  | 2394.00 | 2649.00  | 1419.00 | 3181.50 | 1816.50 | 1739.00 |
|                                    | 90         | 19444.40    | 7469.00  | 8032.40 | 11718.80 | 4370.00 | 7524.00 | 3808.80 | 5589.00 |
| <b>Coordinated stability test</b>  | 10         | 9.00        | 1.70     | 1.00    | 0.00     | 0.50    | 0.50    | 0.00    | 0.00    |
|                                    | 50         | 22.00       | 11.00    | 5.00    | 2.00     | 2.50    | 2.00    | 2.00    | 1.00    |
|                                    | 90         | 34.20       | 31.30    | 13.60   | 13.20    | 5.50    | 8.00    | 4.50    | 7.00    |
| <b>Maximum balance range test*</b> | 10         | 264.78      | 248.50   | 296.00  | 279.28   | 327.71  | 309.18  | 295.22  | 291.40  |
|                                    | 50         | 198.48      | 220.75   | 261.66  | 240.49   | 253.75  | 261.59  | 237.05  | 252.00  |
|                                    | 90         | 121.63      | 178.09   | 170.69  | 202.08   | 198.21  | 191.78  | 199.36  | 188.16  |

Note: \* indicates percentile scale was inverted, i.e., for all items a score over 90th percentile is an indicator of a worse performance.
